# Supplementary material for: Angiomirs expression profiling in diffuse large B-Cell lymphoma
Source: PubMed Central journal article supplement (PMC4826244; doi:10.18632/oncotarget.6624), 2015-12-15
Supplement: oncotarget-07-4806-s001.pdf [file oncotarget-07-4806-s001.pdf]

SUPPLEMENTARY FIGURES

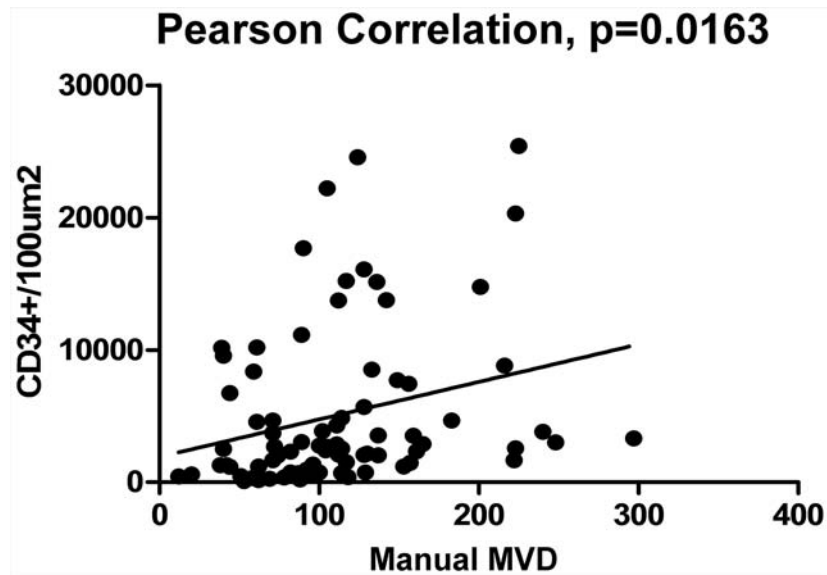

Supplementary Figure S1: Pearson correlation between manual and automated evaluation of MVD (CD34+/100  $\mu\text{m}^2$ ).

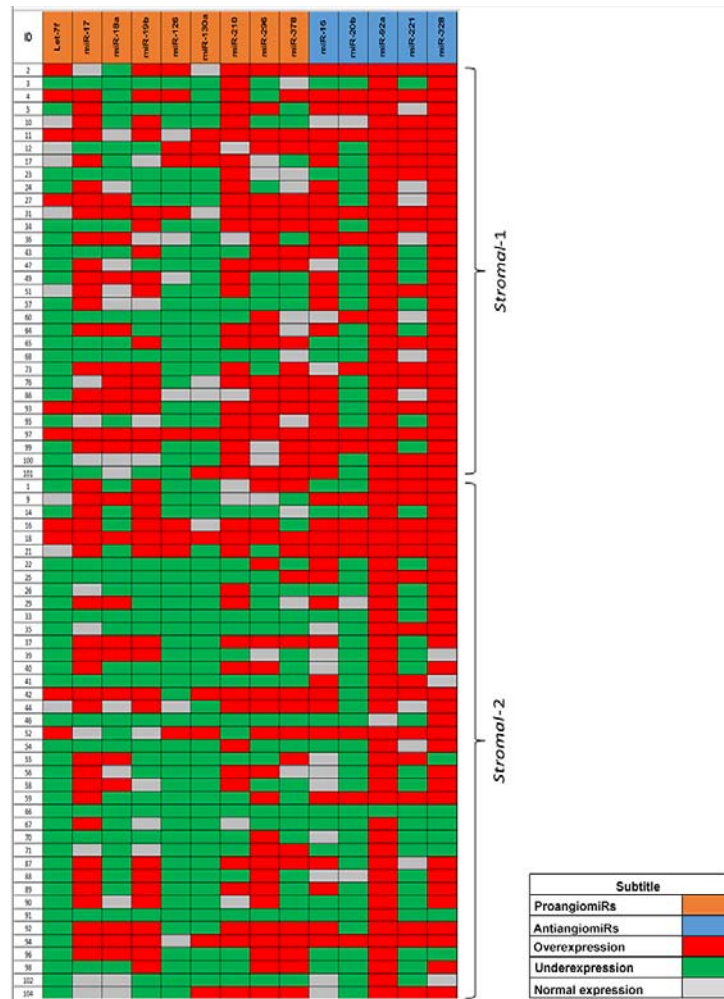

Supplementary Figure S2: Expression of angiomiRs in cases classified as stromal-1 and stromal-2.

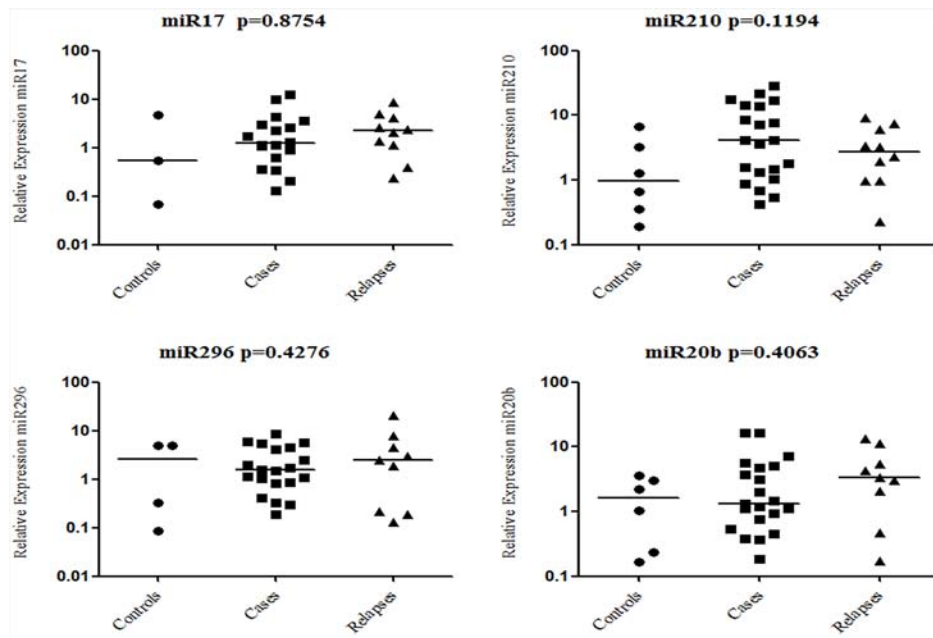

Supplementary Figure S3: Expression of angiomiRs in serum samples.
